# Supplementary material for: Heterologous expression and transcript analysis of gibberellin biosynthetic genes of grasses reveals novel functionality in the GA3ox family
Source: PubMed Central journal article supplement (PMC4455330; doi:10.1186/s12870-015-0520-7), 2015-06-05
Supplement: 12870_2015_520_MOESM3_ESM.pdf [file 12870_2015_520_MOESM3_ESM.pdf]

Additional file 3 - Homoeologue-specific GA gene transcript levels in wheat tissues. Means of 2 reps +/- standard error; Z=Zadoks stage.

| Gene            | root_Z10    | root_Z13    | root_Z39    | leaf_Z10    | leaf_Z23    | leaf_Z71     | stem_Z30    | stem_Z32     | stem_Z65     | spike_Z32   | spike_Z39   | spike_Z65    | grain_Z71   | grain_Z75    | grain_Z85    |
|-----------------|-------------|-------------|-------------|-------------|-------------|--------------|-------------|--------------|--------------|-------------|-------------|--------------|-------------|--------------|--------------|
| TaCPS-A1        | 0.04 ± 0.03 | 0.21 ± 0.07 | 0.11 ± 0.06 | 0.28 ± 0.01 | 0.76 ± 0.14 | 0.15 ± 0.01  | 3.15 ± 0.01 | 1.28 ± 0.01  | 1.40 ± 0.01  | 0.93 ± 0.30 | 2.73 ± 0.33 | 10.06 ± 0.92 | 0.34 ± 0.06 | 4.15 ± 0.26  | 2.97 ± 0.02  |
| TaCPS-B1        | 0.82 ± 0.09 | 1.33 ± 0.43 | 1.33 ± 0.39 | 0.66 ± 0.11 | 1.42 ± 0.07 | 1.18 ± 0.13  | 3.62 ± 0.04 | 1.88 ± 0.24  | 2.17 ± 0.03  | 2.23 ± 0.15 | 4.67 ± 1.05 | 7.05 ± 0.04  | 1.42 ± 0.33 | 0.45 ± 0.09  | 7.27 ± 0.11  |
| TaCPS-D1        | 0.30 ± 0.08 | 0.82 ± 0.39 | 0.87 ± 0.47 | 0.68 ± 0.03 | 1.37 ± 0.08 | 1.61 ± 0.12  | 5.49 ± 0.11 | 1.68 ± 0.16  | 1.45 ± 0.06  | 3.08 ± 0.17 | 4.71 ± 0.62 | 8.17 ± 0.34  | 1.01 ± 0.15 | 0.46 ± 0.08  | 2.41 ± 0.08  |
| TaKS-B1         | 0.62 ± 0.06 | 1.46 ± 0.38 | 1.71 ± 0.59 | 0.29 ± 0.03 | 0.64 ± 0.11 | 0.52 ± 0.02  | 1.05 ± 0.10 | 1.30 ± 0.04  | 0.87 ± 0.04  | 1.27 ± 0.35 | 1.71 ± 0.09 | 2.86 ± 0.19  | 1.31 ± 0.21 | 2.61 ± 0.24  | 0.22 ± 0.03  |
| TaKS-D1         | 0.94 ± 0.00 | 1.66 ± 0.69 | 1.39 ± 0.63 | 0.47 ± 0.03 | 1.78 ± 0.19 | 2.42 ± 0.16  | 1.52 ± 0.06 | 1.99 ± 0.03  | 2.60 ± 0.03  | 2.63 ± 0.57 | 4.36 ± 0.21 | 5.74 ± 0.36  | 1.52 ± 0.16 | 1.63 ± 0.05  | 0.89 ± 0.06  |
| TaKO-A1         | 1.47 ± 0.28 | 2.68 ± 0.19 | 2.39 ± 0.07 | 1.72 ± 0.31 | 1.19 ± 0.26 | 1.29 ± 0.08  | 1.83 ± 0.12 | 2.09 ± 0.24  | 3.03 ± 0.11  | 2.50 ± 0.38 | 1.86 ± 0.20 | 8.85 ± 1.41  | 3.74 ± 0.10 | 11.12 ± 0.72 | 9.33 ± 0.06  |
| TaKO-B2         | 1.05 ± 0.05 | 1.92 ± 0.42 | 1.34 ± 0.12 | 1.20 ± 0.04 | 0.75 ± 0.13 | 0.00 ± 0.00  | 2.02 ± 0.10 | 1.89 ± 0.16  | 1.00 ± 0.11  | 2.19 ± 0.36 | 1.50 ± 0.22 | 4.42 ± 0.40  | 1.79 ± 0.09 | 5.19 ± 0.64  | 16.74 ± 1.99 |
| TaKO-D1         | 1.09 ± 0.08 | 2.28 ± 0.70 | 1.72 ± 0.72 | 1.23 ± 0.01 | 0.38 ± 0.03 | 2.34 ± 0.07  | 0.90 ± 0.06 | 1.94 ± 0.02  | 1.67 ± 0.18  | 1.39 ± 0.11 | 4.03 ± 0.44 | 6.53 ± 0.81  | 2.07 ± 0.24 | 7.19 ± 0.85  | 76.80 ± 2.02 |
| TaKAO-A1        | 0.78 ± 0.20 | 2.30 ± 1.29 | 1.48 ± 0.07 | 2.57 ± 0.29 | 1.87 ± 0.30 | 0.52 ± 0.08  | 0.98 ± 0.31 | 2.58 ± 0.01  | 4.33 ± 0.17  | 3.65 ± 0.26 | 1.43 ± 0.05 | 3.18 ± 0.44  | 0.92 ± 0.05 | 15.14 ± 0.44 | 3.68 ± 0.29  |
| TaKAO-D1        | 1.67 ± 0.25 | 1.86 ± 0.18 | 1.98 ± 1.11 | 0.94 ± 0.23 | 0.72 ± 0.07 | 0.13 ± 0.00  | 0.20 ± 0.01 | 0.57 ± 0.04  | 6.08 ± 0.51  | 0.79 ± 0.09 | 0.28 ± 0.05 | 1.71 ± 0.11  | 0.31 ± 0.08 | 3.82 ± 0.09  | 0.25 ± 0.01  |
| TaKAO-A2        | 0.66 ± 0.00 | 0.29 ± 0.27 | 0.21 ± 0.11 | 0.28 ± 0.03 | 0.24 ± 0.01 | 0.02 ± 0.02  | 0.58 ± 0.07 | 1.24 ± 0.26  | 1.06 ± 0.13  | 1.05 ± 0.10 | 0.49 ± 0.00 | 2.26 ± 0.14  | 0.60 ± 0.05 | 7.18 ± 0.36  | 0.89 ± 0.14  |
| TaGA13ox1A      | 1.41 ± 0.04 | 1.41 ± 0.33 | 2.15 ± 0.43 | 2.49 ± 0.36 | 4.70 ± 0.40 | 32.58 ± 1.05 | 6.58 ± 0.71 | 16.32 ± 0.91 | 22.82 ± 0.08 | 0.61 ± 0.05 | 0.60 ± 0.13 | 4.12 ± 0.63  | 6.55 ± 0.53 | 3.12 ± 0.07  | 0.28 ± 0.01  |
| TaGA13ox1B      | 4.49 ± 0.06 | 7.33 ± 3.76 | 7.62 ± 3.56 | 1.99 ± 0.35 | 1.93 ± 0.42 | 17.61 ± 0.01 | 1.97 ± 0.07 | 6.18 ± 0.63  | 7.51 ± 0.28  | 0.29 ± 0.10 | 0.42 ± 0.25 | 2.63 ± 0.44  | 2.15 ± 0.21 | 0.82 ± 0.23  | 2.65 ± 0.18  |
| TaGA13ox1D      | 4.21 ± 0.28 | 3.96 ± 1.33 | 3.67 ± 0.93 | 0.78 ± 0.03 | 2.55 ± 0.08 | 14.58 ± 0.51 | 1.51 ± 0.17 | 6.42 ± 0.91  | 4.85 ± 0.07  | 0.37 ± 0.16 | 0.39 ± 0.17 | 2.66 ± 0.74  | 7.45 ± 0.18 | 3.30 ± 0.07  | 1.95 ± 0.12  |
| TaGA13ox2A      | 0.05 ± 0.05 | 1.31 ± 0.92 | 0.68 ± 0.09 | 0.00 ± 0.00 | 0.00 ± 0.00 | 2.10 ± 0.12  | 0.03 ± 0.01 | 0.03 ± 0.01  | 0.22 ± 0.04  | 0.06 ± 0.02 | 1.92 ± 0.13 | 7.40 ± 0.39  | 2.03 ± 0.46 | 0.22 ± 0.08  | 0.09 ± 0.01  |
| TaGA13ox2B      | 0.21 ± 0.06 | 1.77 ± 1.33 | 0.73 ± 0.06 | 0.00 ± 0.00 | 0.00 ± 0.00 | 1.14 ± 0.04  | 0.06 ± 0.01 | 0.06 ± 0.02  | 0.24 ± 0.03  | 0.41 ± 0.06 | 1.40 ± 0.11 | 9.64 ± 0.37  | 2.03 ± 0.53 | 0.40 ± 0.03  | 0.60 ± 0.05  |
| TaGA13ox2D      | 0.03 ± 0.01 | 0.16 ± 0.11 | 0.13 ± 0.04 | 0.02 ± 0.02 | 0.00 ± 0.00 | 0.14 ± 0.00  | 0.04 ± 0.02 | 0.01 ± 0.01  | 0.18 ± 0.04  | 0.04 ± 0.00 | 0.40 ± 0.06 | 3.56 ± 0.40  | 0.64 ± 0.01 | 1.04 ± 0.14  | 0.54 ± 0.04  |
| TaGA20ox-A1     | 0.14 ± 0.11 | 0.28 ± 0.02 | 0.39 ± 0.06 | 0.86 ± 0.08 | 0.64 ± 0.00 | 0.61 ± 0.02  | 0.54 ± 0.14 | 1.19 ± 0.04  | 0.58 ± 0.03  | 0.43 ± 0.13 | 0.67 ± 0.01 | 1.66 ± 0.10  | 0.20 ± 0.04 | 0.08 ± 0.03  | 0.16 ± 0.01  |
| TaGA20ox-B1     | 0.67 ± 0.03 | 0.54 ± 0.17 | 0.41 ± 0.23 | 0.96 ± 0.18 | 0.86 ± 0.16 | 0.32 ± 0.08  | 0.44 ± 0.18 | 1.43 ± 0.29  | 0.65 ± 0.03  | 0.51 ± 0.11 | 0.52 ± 0.09 | 1.14 ± 0.38  | 0.51 ± 0.12 | 0.22 ± 0.05  | 0.00 ± 0.00  |
| TaGA20ox-D1     | 0.13 ± 0.02 | 0.85 ± 0.45 | 0.59 ± 0.05 | 1.04 ± 0.22 | 0.77 ± 0.02 | 0.12 ± 0.01  | 1.00 ± 0.43 | 1.45 ± 0.07  | 0.25 ± 0.04  | 0.49 ± 0.23 | 0.79 ± 0.02 | 0.66 ± 0.01  | 0.04 ± 0.00 | 0.40 ± 0.04  | 0.06 ± 0.06  |
| TaGA20ox-A2     | 0.07 ± 0.05 | 0.05 ± 0.05 | 0.09 ± 0.09 | 0.16 ± 0.07 | 0.71 ± 0.13 | 0.61 ± 0.16  | 0.35 ± 0.11 | 0.12 ± 0.06  | 0.55 ± 0.08  | 0.55 ± 0.21 | 0.54 ± 0.12 | 0.25 ± 0.06  | 0.10 ± 0.01 | 0.15 ± 0.05  | 0.04 ± 0.00  |
| TaGA20ox-B2     | 0.01 ± 0.01 | 0.00 ± 0.00 | 0.00 ± 0.00 | 0.29 ± 0.14 | 1.26 ± 0.06 | 0.95 ± 0.17  | 0.48 ± 0.25 | 0.08 ± 0.06  | 1.70 ± 0.32  | 0.24 ± 0.01 | 0.73 ± 0.17 | 0.24 ± 0.05  | 0.18 ± 0.03 | 0.02 ± 0.02  | 0.15 ± 0.11  |
| TaGA20ox-D2     | 0.03 ± 0.03 | 0.05 ± 0.02 | 0.13 ± 0.13 | 0.11 ± 0.02 | 1.28 ± 0.32 | 5.42 ± 0.23  | 0.40 ± 0.09 | 0.22 ± 0.11  | 0.77 ± 0.30  | 0.67 ± 0.02 | 0.90 ± 0.21 | 1.08 ± 0.18  | 0.43 ± 0.16 | 0.00 ± 0.00  | 0.02 ± 0.02  |
| TaGA20ox-A3     | 0.02 ± 0.02 | 0.00 ± 0.00 | 0.00 ± 0.00 | 0.00 ± 0.00 | 0.00 ± 0.00 | 0.00 ± 0.00  | 0.00 ± 0.00 | 0.00 ± 0.00  | 0.00 ± 0.00  | 0.00 ± 0.00 | 0.00 ± 0.00 | 0.29 ± 0.06  | 0.12 ± 0.08 | 9.33 ± 0.06  | 0.03 ± 0.03  |
| TaGA20ox-B3     | 0.00 ± 0.00 | 0.02 ± 0.02 | 0.00 ± 0.00 | 0.02 ± 0.02 | 0.00 ± 0.00 | 0.00 ± 0.00  | 0.00 ± 0.00 | 0.00 ± 0.00  | 0.00 ± 0.00  | 0.00 ± 0.00 | 0.02 ± 0.02 | 0.39 ± 0.13  | 0.10 ± 0.06 | 26.09 ± 0.09 | 0.12 ± 0.03  |
| TaGA20ox-D3     | 0.05 ± 0.01 | 0.20 ± 0.16 | 0.28 ± 0.16 | 0.00 ± 0.00 | 0.00 ± 0.00 | 0.00 ± 0.00  | 0.02 ± 0.02 | 0.00 ± 0.00  | 0.00 ± 0.00  | 0.00 ± 0.00 | 0.00 ± 0.00 | 0.09 ± 0.05  | 0.10 ± 0.06 | 0.71 ± 0.10  | 0.02 ± 0.02  |
| TaGA20ox-A4     | 0.14 ± 0.04 | 0.07 ± 0.07 | 0.00 ± 0.00 | 0.25 ± 0.11 | 0.11 ± 0.02 | 0.19 ± 0.07  | 0.00 ± 0.00 | 0.14 ± 0.03  | 0.00 ± 0.00  | 0.34 ± 0.09 | 0.54 ± 0.05 | 6.35 ± 0.39  | 0.11 ± 0.01 | 0.35 ± 0.04  | 0.85 ± 0.13  |
| TaGA20ox-B4     | 0.03 ± 0.03 | 0.00 ± 0.00 | 0.00 ± 0.00 | 0.01 ± 0.01 | 0.00 ± 0.00 | 1.05 ± 0.06  | 0.00 ± 0.00 | 0.00 ± 0.00  | 0.12 ± 0.02  | 0.35 ± 0.08 | 0.41 ± 0.12 | 1.55 ± 0.16  | 0.11 ± 0.01 | 0.20 ± 0.00  | 0.09 ± 0.05  |
| TaGA20ox-D4     | 0.59 ± 0.15 | 0.05 ± 0.05 | 0.09 ± 0.09 | 0.19 ± 0.04 | 0.09 ± 0.04 | 0.12 ± 0.08  | 0.00 ± 0.00 | 0.00 ± 0.00  | 0.28 ± 0.05  | 0.28 ± 0.12 | 0.42 ± 0.12 | 1.86 ± 0.56  | 0.42 ± 0.12 | 0.43 ± 0.07  | 0.34 ± 0.03  |
| TaGA3ox-A2      | 0.69 ± 0.12 | 1.41 ± 0.37 | 1.28 ± 0.85 | 0.29 ± 0.10 | 0.06 ± 0.03 | 0.00 ± 0.00  | 1.03 ± 0.63 | 0.61 ± 0.02  | 0.07 ± 0.00  | 0.33 ± 0.04 | 0.84 ± 0.05 | 3.40 ± 0.92  | 0.04 ± 0.00 | 0.11 ± 0.00  | 0.38 ± 0.10  |
| TaGA3ox-B2      | 0.21 ± 0.02 | 0.51 ± 0.25 | 0.39 ± 0.17 | 0.63 ± 0.10 | 0.14 ± 0.04 | 0.00 ± 0.00  | 4.69 ± 1.48 | 3.02 ± 0.49  | 0.07 ± 0.07  | 0.95 ± 0.13 | 1.12 ± 0.22 | 3.41 ± 0.68  | 0.41 ± 0.01 | 0.00 ± 0.00  | 0.13 ± 0.03  |
| TaGA3ox-D2      | 0.63 ± 0.07 | 0.46 ± 0.14 | 0.81 ± 0.56 | 0.65 ± 0.08 | 0.10 ± 0.06 | 0.00 ± 0.00  | 2.22 ± 1.17 | 0.63 ± 0.05  | 0.13 ± 0.02  | 0.46 ± 0.03 | 0.72 ± 0.14 | 2.87 ± 0.45  | 0.08 ± 0.04 | 0.08 ± 0.03  | 0.35 ± 0.01  |
| TaGA3ox-A3      | 0.00 ± 0.00 | 0.00 ± 0.00 | 0.00 ± 0.00 | 0.00 ± 0.00 | 0.00 ± 0.00 | 0.00 ± 0.00  | 0.00 ± 0.00 | 0.00 ± 0.00  | 0.00 ± 0.00  | 0.03 ± 0.03 | 0.00 ± 0.00 | 0.00 ± 0.00  | 0.00 ± 0.00 | 13.97 ± 0.37 | 0.00 ± 0.00  |
| TaGA3ox-B3      | 0.02 ± 0.02 | 0.14 ± 0.08 | 0.15 ± 0.05 | 0.00 ± 0.00 | 0.00 ± 0.00 | 0.00 ± 0.00  | 0.00 ± 0.00 | 0.00 ± 0.00  | 0.00 ± 0.00  | 0.00 ± 0.00 | 0.00 ± 0.00 | 0.00 ± 0.00  | 0.00 ± 0.00 | 27.11 ± 2.09 | 0.00 ± 0.00  |
| TaGA3ox-D3      | 0.00 ± 0.00 | 0.00 ± 0.00 | 0.00 ± 0.00 | 0.00 ± 0.00 | 0.00 ± 0.00 | 0.00 ± 0.00  | 0.00 ± 0.00 | 0.00 ± 0.00  | 0.00 ± 0.00  | 0.00 ± 0.00 | 0.00 ± 0.00 | 0.00 ± 0.00  | 0.00 ± 0.00 | 0.30 ± 0.09  | 0.00 ± 0.00  |
| TaGA1ox-B1      | 0.02 ± 0.02 | 1.04 ± 0.64 | 0.84 ± 0.36 | 0.00 ± 0.00 | 0.00 ± 0.00 | 0.00 ± 0.00  | 0.00 ± 0.00 | 0.00 ± 0.00  | 0.00 ± 0.00  | 0.00 ± 0.00 | 0.00 ± 0.00 | 0.09 ± 0.00  | 0.00 ± 0.00 | 23.60 ± 0.10 | 0.02 ± 0.02  |
| TaGA2ox-A1      | 0.06 ± 0.03 | 0.48 ± 0.30 | 0.39 ± 0.25 | 0.07 ± 0.00 | 0.08 ± 0.01 | 0.07 ± 0.03  | 0.29 ± 0.00 | 0.10 ± 0.02  | 0.07 ± 0.00  | 0.16 ± 0.01 | 0.10 ± 0.02 | 0.18 ± 0.09  | 0.05 ± 0.02 | 0.16 ± 0.11  | 0.13 ± 0.01  |
| TaGA2ox-B1      | 0.09 ± 0.02 | 0.06 ± 0.03 | 0.10 ± 0.01 | 0.03 ± 0.00 | 0.10 ± 0.03 | 0.00 ± 0.00  | 0.36 ± 0.04 | 0.05 ± 0.02  | 0.04 ± 0.00  | 0.05 ± 0.05 | 0.05 ± 0.01 | 0.03 ± 0.00  | 0.02 ± 0.02 | 0.03 ± 0.03  | 0.00 ± 0.00  |
| TaGA2ox-D1      | 0.05 ± 0.02 | 0.19 ± 0.08 | 0.20 ± 0.05 | 0.03 ± 0.00 | 0.03 ± 0.00 | 0.06 ± 0.03  | 0.23 ± 0.03 | 0.05 ± 0.05  | 0.00 ± 0.00  | 0.02 ± 0.02 | 0.05 ± 0.01 | 0.02 ± 0.02  | 0.00 ± 0.00 | 0.00 ± 0.00  | 0.02 ± 0.02  |
| TaGA2ox-D2      | 0.00 ± 0.00 | 0.00 ± 0.00 | 0.00 ± 0.00 | 0.00 ± 0.00 | 0.00 ± 0.00 | 0.00 ± 0.00  | 0.00 ± 0.00 | 0.00 ± 0.00  | 0.00 ± 0.00  | 0.00 ± 0.00 | 0.00 ± 0.00 | 0.00 ± 0.00  | 0.02 ± 0.02 | 0.00 ± 0.00  | 0.00 ± 0.00  |
| TaGA2ox-A3      | 6.07 ± 0.16 | 3.36 ± 0.79 | 3.66 ± 1.34 | 1.18 ± 0.18 | 0.36 ± 0.15 | 0.07 ± 0.03  | 1.33 ± 0.08 | 3.89 ± 0.12  | 1.84 ± 0.65  | 0.53 ± 0.26 | 0.94 ± 0.02 | 2.07 ± 0.12  | 0.53 ± 0.11 | 0.25 ± 0.06  | 0.10 ± 0.01  |
| TaGA2ox-B3      | 8.55 ± 0.28 | 7.25 ± 2.37 | 8.74 ± 6.05 | 0.58 ± 0.24 | 0.27 ± 0.02 | 0.12 ± 0.08  | 1.27 ± 0.12 | 1.80 ± 0.33  | 0.27 ± 0.03  | 0.35 ± 0.04 | 0.26 ± 0.12 | 1.36 ± 0.22  | 0.86 ± 0.08 | 0.70 ± 0.08  | 0.08 ± 0.03  |
| TaGA2ox-D3      | 5.42 ± 0.45 | 4.53 ± 0.47 | 4.90 ± 2.55 | 0.74 ± 0.04 | 0.13 ± 0.13 | 0.05 ± 0.01  | 1.48 ± 0.07 | 1.49 ± 0.28  | 0.80 ± 0.07  | 0.73 ± 0.12 | 0.41 ± 0.05 | 2.42 ± 0.12  | 0.70 ± 0.21 | 0.23 ± 0.16  | 0.39 ± 0.01  |
| TaGA2ox-A4      | 0.36 ± 0.02 | 5.58 ± 4.02 | 7.10 ± 6.71 | 0.90 ± 0.03 | 3.91 ± 0.79 | 0.18 ± 0.06  | 1.20 ± 0.32 | 5.03 ± 0.35  | 0.31 ± 0.11  | 0.19 ± 0.09 | 0.27 ± 0.27 | 0.05 ± 0.02  | 0.04 ± 0.00 | 0.00 ± 0.00  | 0.00 ± 0.00  |
| TaGA2ox-B4      | 0.02 ± 0.02 | 0.11 ± 0.11 | 0.06 ± 0.06 | 1.14 ± 0.47 | 3.14 ± 0.84 | 0.04 ± 0.01  | 0.57 ± 0.01 | 1.37 ± 0.18  | 0.20 ± 0.04  | 0.02 ± 0.02 | 0.04 ± 0.00 | 0.24 ± 0.00  | 0.27 ± 0.01 | 0.00 ± 0.00  | 0.00 ± 0.00  |
| TaGA2ox-D4(5BL) | 0.03 ± 0.03 | 0.31 ± 0.22 | 0.65 ± 0.57 | 0.49 ± 0.28 | 2.11 ± 0.41 | 0.12 ± 0.03  | 1.43 ± 0.23 | 3.62 ± 0.31  | 0.47 ± 0.05  | 0.55 ± 0.18 | 0.39 ± 0.19 | 0.22 ± 0.04  | 0.61 ± 0.12 | 0.00 ± 0.00  | 0.00 ± 0.00  |
| TaGA2ox-A6      | 0.36 ± 0.07 | 0.07 ± 0.01 | 0.03 ± 0.03 | 0.05 ± 0.05 | 0.04 ± 0.04 | 0.00 ± 0.00  | 0.03 ± 0.00 | 0.19 ± 0.07  | 0.02 ± 0.02  | 0.11 ± 0.04 | 0.07 ± 0.01 | 2.17 ± 0.33  | 0.02 ± 0.02 | 0.06 ± 0.06  | 0.51 ± 0.11  |
| TaGA2ox-B6      | 0.58 ± 0.04 | 0.10 ± 0.01 | 0.18 ± 0.14 | 0.19 ± 0.01 | 0.20 ± 0.02 | 0.00 ± 0.00  | 0.04 ± 0.04 | 0.22 ± 0.14  | 0.00 ± 0.00  | 0.02 ± 0.02 | 0.00 ± 0.00 | 1.31 ± 0.26  | 0.08 ± 0.04 | 0.11 ± 0.05  | 0.56 ± 0.02  |
| TaGA2ox-D6      | 0.85 ± 0.19 | 0.24 ± 0.08 | 0.25 ± 0.14 | 0.18 ± 0.08 | 0.07 ± 0.07 | 0.00 ± 0.00  | 0.00 ± 0.00 | 0.21 ± 0.04  | 0.00 ± 0.00  | 0.03 ± 0.03 | 0.00 ± 0.00 | 2.29 ± 0.53  | 0.26 ± 0.06 | 0.08 ± 0.03  | 0.84 ± 0.00  |
| TaGA2ox-A7      | 0.02 ± 0.02 | 0.14 ± 0.14 | 0.02 ± 0.02 | 0.04 ± 0.04 | 0.36 ± 0.13 | 0.09 ± 0.01  | 0.03 ± 0.03 | 0.17 ± 0.04  | 0.59 ± 0.11  | 0.73 ± 0.22 | 0.24 ± 0.04 | 1.50 ± 0.22  | 5.64 ± 1.20 | 4.99 ± 0.03  | 0.05 ± 0.05  |
| TaGA2ox-B7      | 0.06 ± 0.06 | 0.15        |             |             |             |              |             |              |              |             |             |              |             |              |              |
